# Supplementary material
Source: PubMed Central journal article supplement (PMC4256859)
Supplement: supp_pp.114.248930_248930Supplemental_Figure_S2.pdf [file supp_pp.114.248930_248930Supplemental_Figure_S2.pdf]

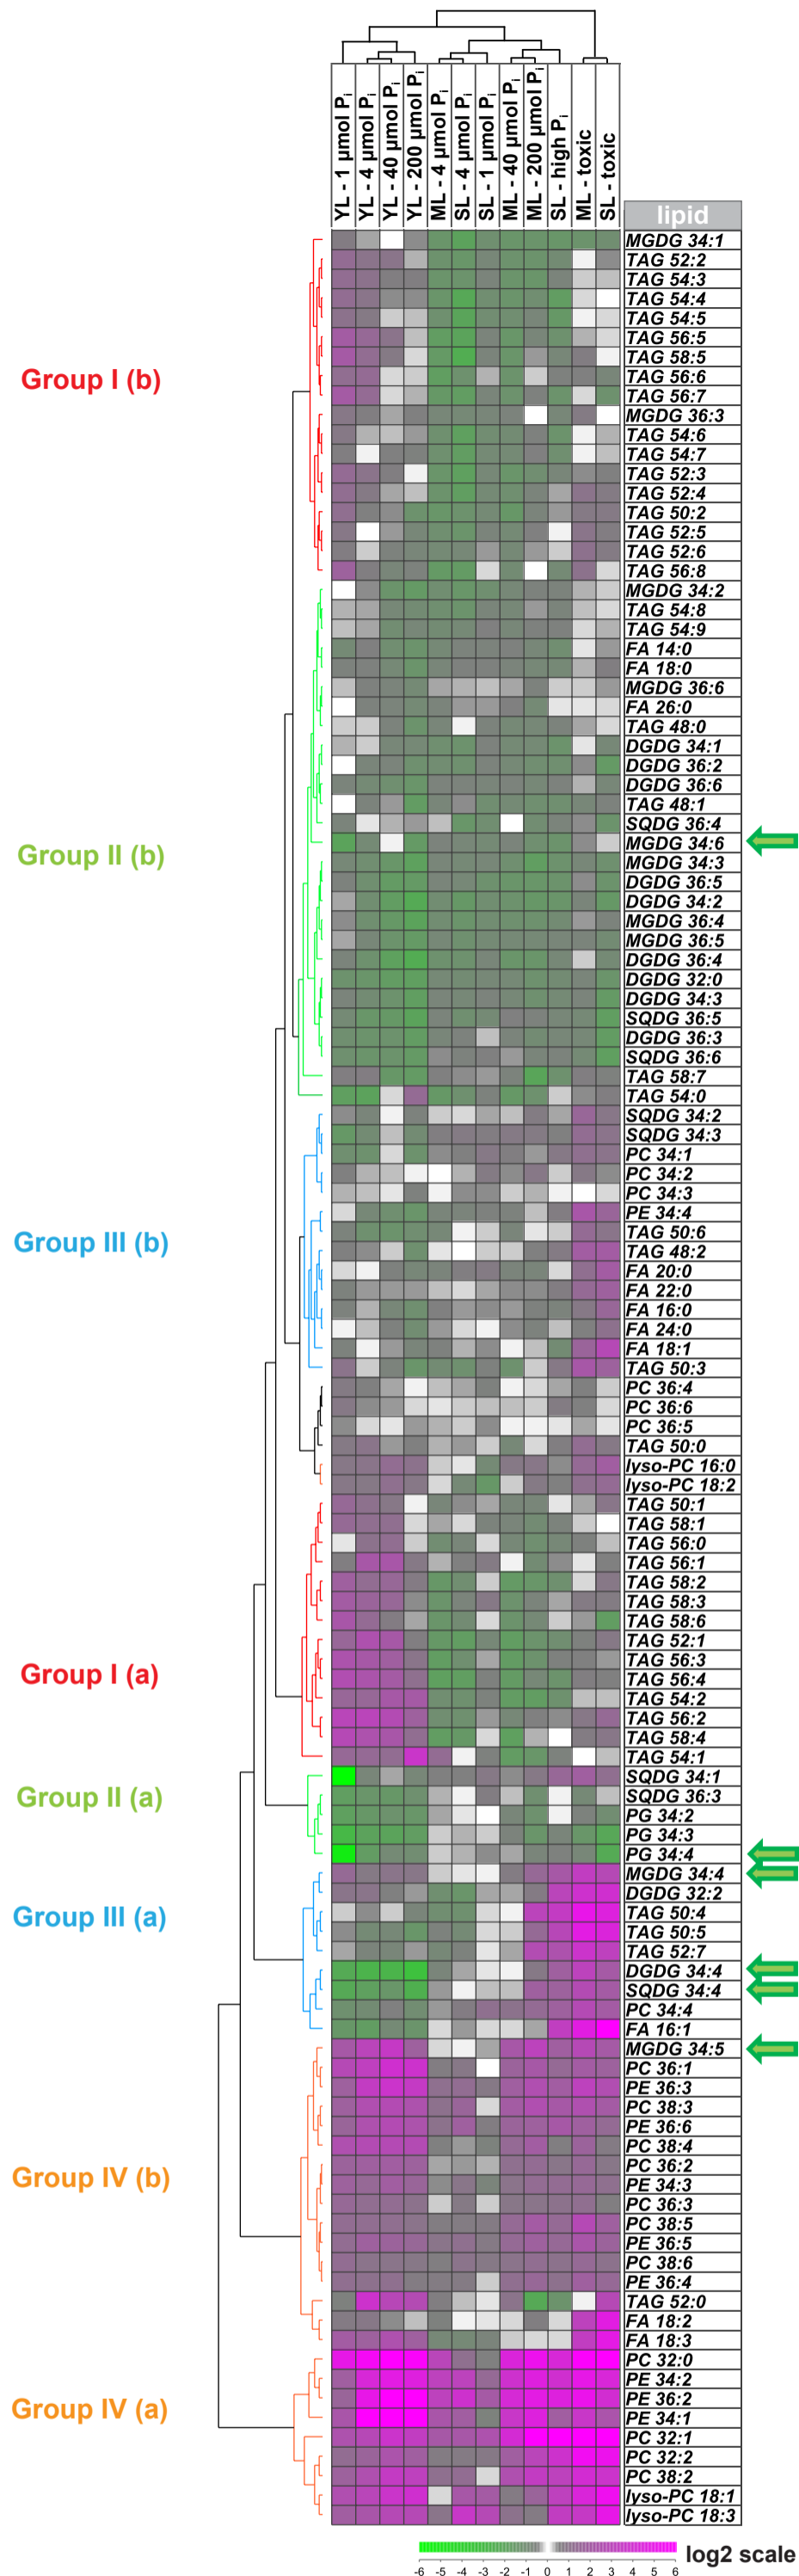

**Group I = leaf structural development, mainly comprises ER-derived 'storage' TAG, highest in young leaves of P-limited plants**

**Group II (a) = chloroplast maturation / photosystem development, highest in mature leaves of P-limited plants**

**Group II (b) = glycolipids involved in P-dependent lipid remodelling, show a strong negative correlation with P<sub>i</sub> supply**

**Group III = chloroplast maturation / photosystem development, but also highly sensitive to excess P<sub>i</sub> supply**

**Group IV = plasmamembrane lipids / phospholipids, show a strong positive correlation with P<sub>i</sub> supply in all leaves**

**Supplemental Figure S2:** Hierarchical cluster analysis of changes in lipid profiles during leaf development and in response to phosphate (P<sub>i</sub>) supply. Normalized mass spectral signal values were expressed relative to those in mature leaves of phosphorus-limited plants (experiment B). The clusters were generated in J-Express using squared Euclidean distance and complete linkage. For more information refer to the text and Supplemental Table S3. Lipid species most likely of prokaryotic origin are highlighted by green arrows.
